# Supplementary material
Source: PubMed Central journal article supplement (PMC2785614)

Supplementary Information JBC/2009/010058

Table S1: Data collection and refinement statistics

|                                                                                   |                                               |                                               |                                               |
|-----------------------------------------------------------------------------------|-----------------------------------------------|-----------------------------------------------|-----------------------------------------------|
| <b>Data set</b>                                                                   | Carboxin                                      | PCP                                           | Empty Q-site                                  |
| <b>Beamline</b>                                                                   | ESRF ID23-1                                   | ESRF ID23-1                                   | ESRF ID23-1                                   |
| <b>Wavelength (Å)</b>                                                             | 0.97620                                       | 0.97625                                       | 0.97620                                       |
| <b>Space group</b>                                                                | P2 <sub>1</sub> 2 <sub>1</sub> 2 <sub>1</sub> | P2 <sub>1</sub> 2 <sub>1</sub> 2 <sub>1</sub> | P2 <sub>1</sub> 2 <sub>1</sub> 2 <sub>1</sub> |
| <b>Unit cell (Å)</b>                                                              | 119.4, 178.5, 200.9                           | 120.0, 186.1, 204.0                           | 120.3, 184.8, 204.7                           |
| <b>Resolution (Å)</b>                                                             | 22.96-2.4 (2.53-2.4)                          | 50.06-3.2 (3.37-3.2)                          | 52.85-3.2 (3.37-3.2)                          |
| <b>R<sub>merge</sub> (%)*</b>                                                     | 9.9 (50.3)                                    | 12.5 (54.2)                                   | 15.3 (70.3)                                   |
| <b>Completeness (%)</b>                                                           | 99.7 (99.9)                                   | 99.3 (97.9)                                   | 99.8 (100.0)                                  |
| <b>&lt;&lt;I&gt;/σ&lt;I&gt;&gt;</b>                                               | 10.2 (2.6)                                    | 9.8 (2.1)                                     | 8.7 (2.2)                                     |
| <b>Observed reflections</b>                                                       | 597048 (85843)                                | 245632 (33570)                                | 270319 (40189)                                |
| <b>Unique reflections</b>                                                         | 166937 (24260)                                | 76421 (10884)                                 | 76081 (11003)                                 |
| <b>Redundancy</b>                                                                 | 3.6 (3.5)                                     | 3.2 (3.1)                                     | 3.6 (3.7)                                     |
| <b>Refinement statistics</b>                                                      |                                               |                                               |                                               |
| <b>Resolution (Å)</b>                                                             | 133.63-2.4 (2.462-2.4)                        | 46.52-3.2 (3.283-3.2)                         | 51.85-3.2 (3.283-3.2)                         |
| <b>Reflections working set (test set)</b>                                         | 158494 (8380)                                 | 71558 (3828)                                  | 71862 (3844)                                  |
| <b>R<sub>cryst</sub> (R<sub>free</sub>) (%)†</b>                                  | 17.1 (20.0)                                   | 19.7 (22.8)                                   | 20.5 (23.3)                                   |
| <b>Total number of atoms used</b>                                                 | 26034                                         | 24936                                         | 24855                                         |
| <b>B factors</b>                                                                  |                                               |                                               |                                               |
| <b>From Wilson Plot (Å<sup>2</sup>)</b>                                           | 40.5                                          | 51.7¶                                         | 55.3¶                                         |
| <b>Mean atomic B factor (Å<sup>2</sup>)</b>                                       | 47.6                                          | 55.0                                          | 68.6                                          |
| <b>Anisotropic B<sub>11</sub>, B<sub>22</sub>, B<sub>33</sub> (Å<sup>2</sup>)</b> | -3.02, 4.37, -1.34                            | -3.12, 2.40, 0.72                             | -4.71, 1.74, 2.97                             |
| <b>RMS deviations</b>                                                             |                                               |                                               |                                               |
| <b>Bond lengths (Å)</b>                                                           | 0.014                                         | 0.009                                         | 0.011                                         |
| <b>Bond angles (°)</b>                                                            | 1.382                                         | 1.066                                         | 1.264                                         |
| <b>Cruickshank's DPI for coordinate error (Å)§</b>                                | 0.190                                         | 0.420                                         | 0.428                                         |
| <b>Molprobit scores</b>                                                           |                                               |                                               |                                               |
| <b>Rotamer outliers (%)</b>                                                       | 2.03                                          | 1.91                                          | 2.64                                          |

|                                           |           |            |            |
|-------------------------------------------|-----------|------------|------------|
| <b>Ramachandran outliers (%)</b>          | 0.03      | 0.13       | 0.13       |
| <b>Ramachandran favored (%)</b>           | 97.35     | 96.17      | 96.20      |
| <b>Clash score (percentile)</b>           | 9.73 (95) | 14.25 (95) | 11.45 (95) |
| <b>Overall quality score (percentile)</b> | 1.87 (96) | 2.13 (99)  | 2.15 (99)  |

\* $R_{\text{merge}} = \frac{\sum_{\mathbf{h}} \sum_l |I_{hl} - \langle I_{\mathbf{h}} \rangle|}{\sum_{\mathbf{h}} \sum_l \langle I_{\mathbf{h}} \rangle}$ , where  $I_{hl}$  is the  $l$ th observation of reflection  $\mathbf{h}$ , and  $\langle I_{\mathbf{h}} \rangle$  is the weighted average intensity for all observations  $l$  of reflection  $\mathbf{h}$ .

† $R_{\text{cryst}} = \frac{\sum ||F_{\text{obs}}| - |F_{\text{calc}}||}{\sum |F_{\text{obs}}|}$ , where  $F_{\text{obs}}$  and  $F_{\text{calc}}$  are the observed and calculated structure factor amplitudes, respectively.  $R_{\text{free}}$  was calculated as for  $R_{\text{cryst}}$ , but using the test set of reflections (5% of the diffraction data that were selected randomly and not used during refinement).

§  $\text{DPI} = (N_{\text{atoms}} / (N_{\text{obs}} - 4N_{\text{atoms}}))^{1/2} c^{-1/3} d_{\text{min}} R$ , where  $N_{\text{atoms}}$  is the total number of atoms in the unit cell,  $N_{\text{obs}}$  is the total number of observed reflections,  $c$  is the completeness (expressed as a fraction),  $d_{\text{min}}$  is the minimum d spacing, and  $R$  is the conventional R factor. Calculated by the CCP4 program SFCHECK.

¶ Calculated by phenix.refine

**Supplementary Figure S1:** Assay for stability of *E. coli* SQR in different detergents. SQR was purified following established protocols (15, 21), and then diluted 50-fold into a range of different buffered detergent solutions. Samples were incubated at 20 °C, and spun at high speed at different time points to pellet aggregated protein. UV/Visible spectrophotometry was used to follow the decrease in SQR concentration in the supernatant due to aggregation. Representative UV/Visible spectra are shown below for the detergents C<sub>12</sub>E<sub>9</sub> (A), which has been used extensively in studies of SQR, DDM (B) and OG (C). Spectra are shown at t=0 (red), t=6 hours (orange), t=23 hours (yellow), t=29 hours (green), t=47 hours (blue), t=53 hours (dark blue), t=70 hours (purple) and t=76 hours (black).

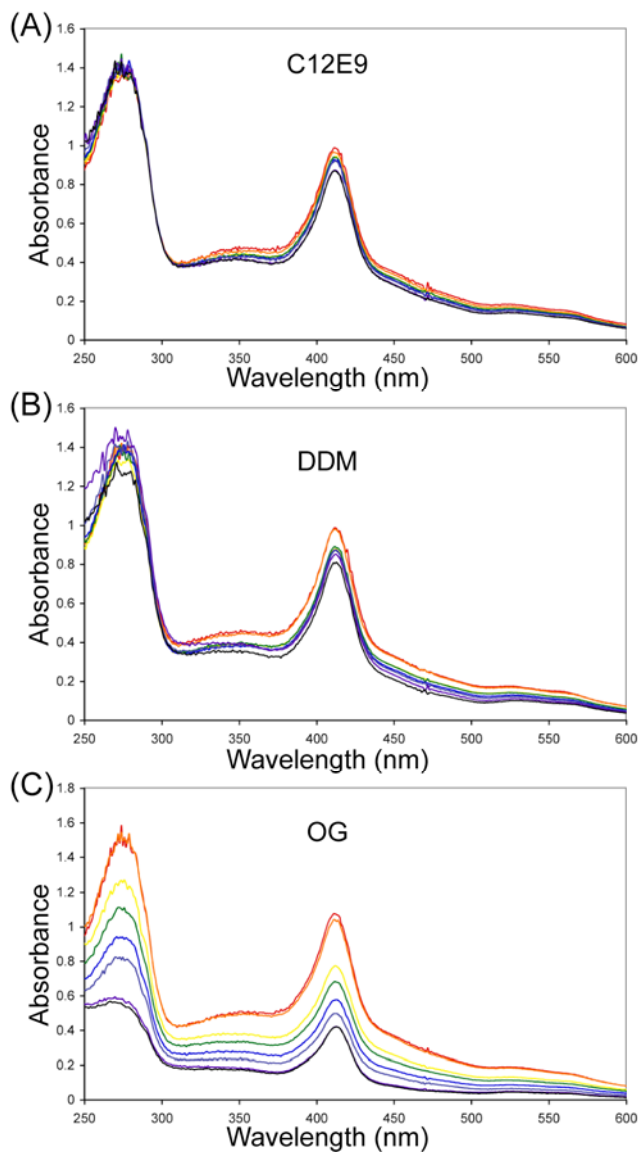

**Supplementary Figure S2:** Comparison of packing in the orthorhombic  $P2_12_12_1$  (A) and trigonal  $R32$  (B) crystal forms of *E. coli* SQR (pdb code 1NEK). The C $\alpha$  atoms of SQR trimers are shown as different colored ribbons.

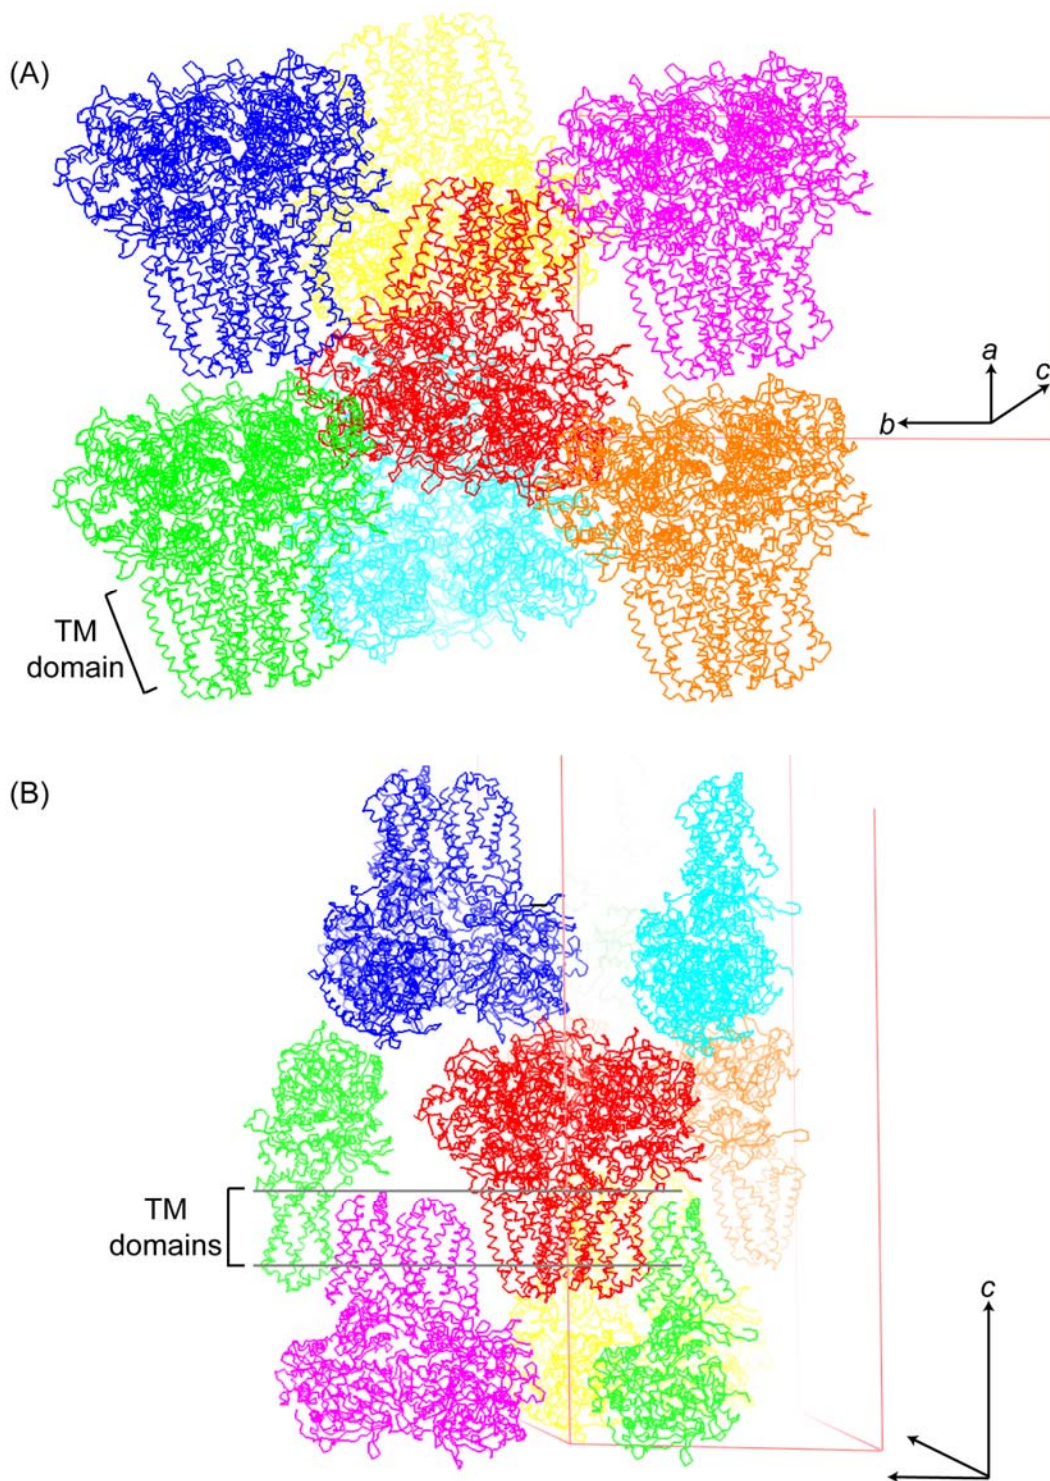

**Supplementary Figure S3:** Atoms involved in crystal contacts in the orthorhombic crystal form of SQR binding carboxin are shown as coloured spheres. (A) View from the cytoplasm perpendicular to the membrane plane, (B) view parallel to the membrane plane.

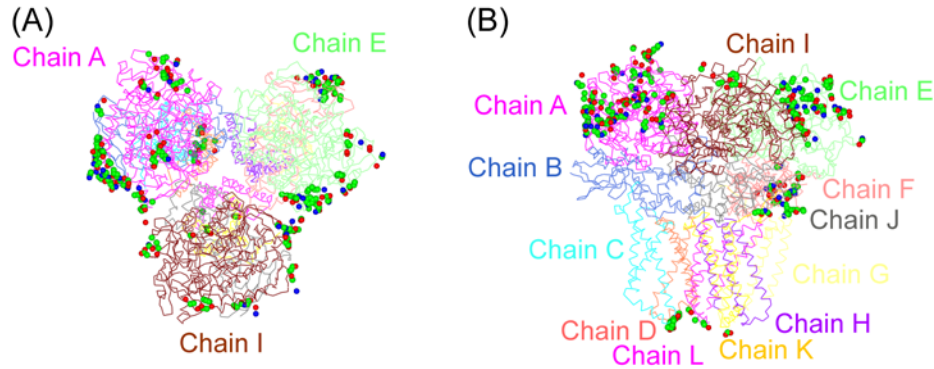

**Supplementary Figure S4:** Comparison of *B*-factor distributions in (a) the orthorhombic  $P2_12_12_1$  and (b) *R32* (pdb code 1NEK) crystal forms of *E. coli* SQR. The average *B*-factor (whole chain) for each subunit is shown in brackets. For the orthorhombic crystal form, the total *B*-factor is shown (including residual and TLS components after TLS refinement).

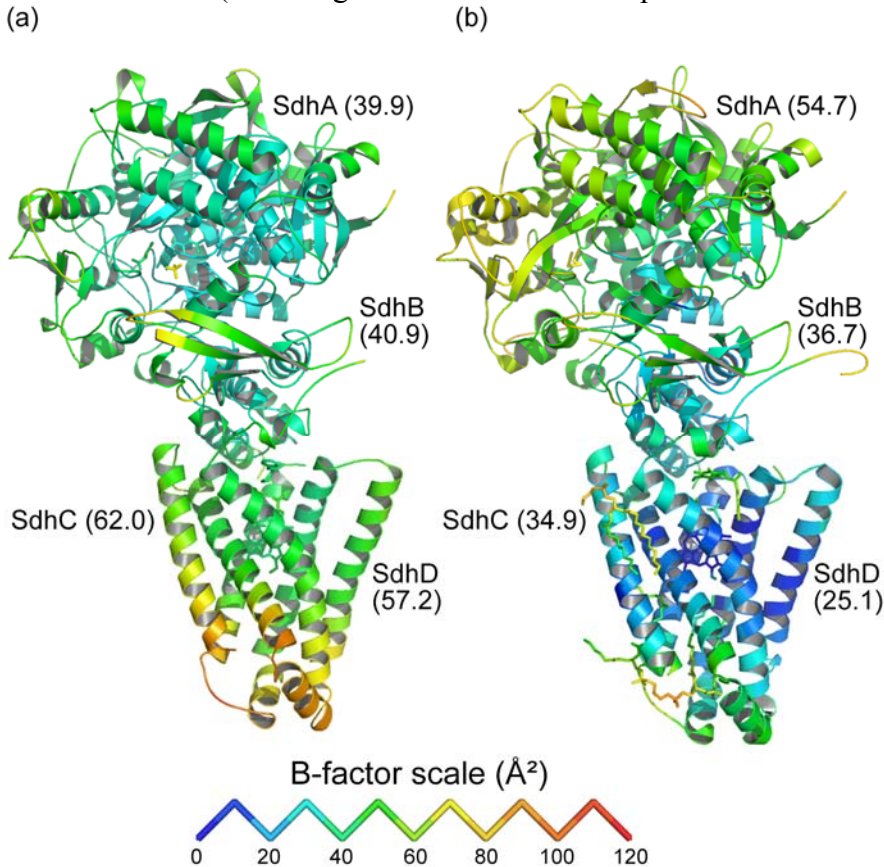

**Supplementary Figure S5:** (A) Crystal contacts in the  $P2_12_12_1$  crystal form of SQR with an empty Q-site. Atoms involved in crystal contacts are shown as coloured spheres. (B) TLS-derived anisotropic atomic displacement parameters, shown as black thermal ellipsoids, following TLS refinement of the empty Q-site structure.

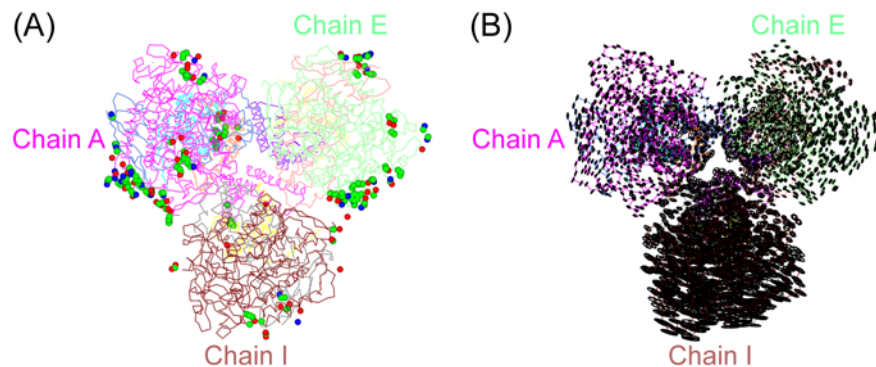

**Supplementary Figure S6:** (A) View of the carboxin-binding site in *E. coli* SQR. Density in blue mesh is a  $2mF_o-DF_c$  map, contoured at  $5\sigma$ . (B) View of the carboxin-binding site in avian SQR (pdb code 2FBW). Density is an  $mF_o-DF_c$  map, obtained from the coordinates and structure factors deposited at the PDB, contoured at  $+3\sigma$  in blue mesh, and  $-3\sigma$  in red mesh.

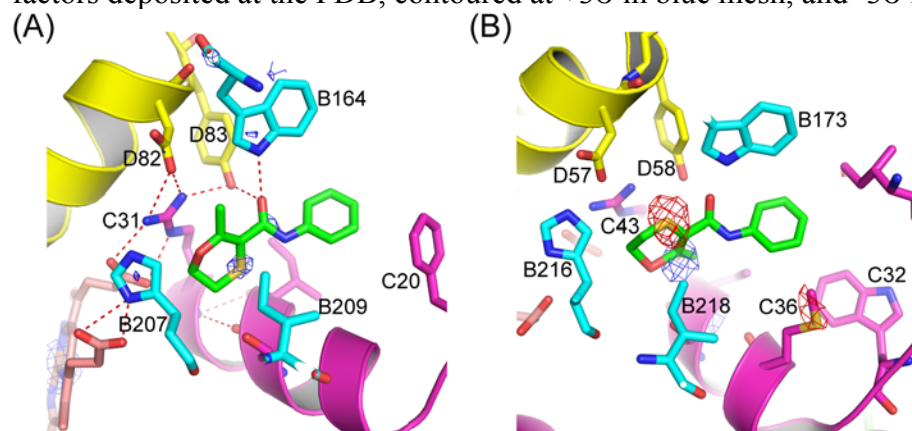

**Supplementary Figure S7:** A view showing the Fe-S clusters and the position of Arg B205 and Lys B230, two residues mutated in order to probe a possible water-mediated proton transfer pathway found in the WT/carboxin structure. The SdhA subunit is colored green, SdhB is cyan, SdhC magenta and SdhD yellow. Carboxin atoms are shown as salmon spheres, heme as red spheres, and the Fe-S clusters as orange and yellow spheres. The side chains of Arg B205 and Lys B230 are shown as spheres, with carbon atoms colored cyan, nitrogen blue and oxygen red.

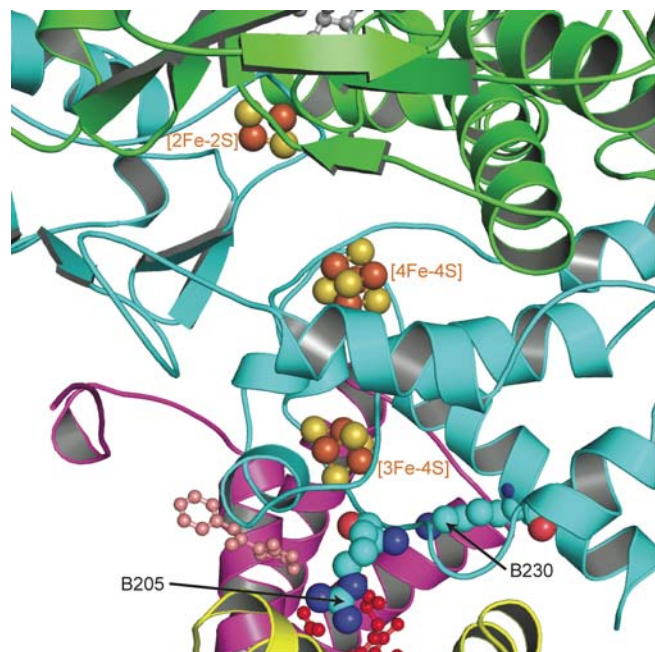

Supplement: supp_M109.010058_jbc.M109.010058-1.pdf [file supp_M109.010058_jbc.M109.010058-1.pdf]
